# Supplementary material
Source: ML conference proceedings conference paper supplement (https://openreview.net/forum?id=hiiaHn3pWd)
Supplement: supplementary_material [file NIPS2025_appendix.pdf › NIPS2025_supp/NIPS2025_appendix.pdf]

## A Supplementary real-world results

Table 3 reports the per-task success rates of CoA, ACT, and DP across 8 real-world kitchen manipulation tasks. CoA consistently achieves the highest average performance.

Table 3: Per-task success rate in real-world experiments.

| Task               | CoA          | ACT   | DP    |
|--------------------|--------------|-------|-------|
| close cabinet      | 0.80         | 1.00  | 0.90  |
| close fridge lower | 0.20         | 0.50  | 0.60  |
| close fridge upper | 0.70         | 0.40  | 0.80  |
| open cabinet       | 0.50         | 0.40  | 0.10  |
| open fridge lower  | 0.70         | 0.40  | 0.00  |
| open microwave     | 0.80         | 0.30  | 0.50  |
| place in cabinet   | 0.70         | 0.10  | 0.00  |
| place in fridge    | 0.50         | 0.60  | 0.00  |
| Avg.               | <b>0.613</b> | 0.463 | 0.363 |

## B Per-task success rates on RLBench

To complement the summary figure in the main paper, which visualizes the performance gap between CoA and baseline methods, we provide the full success rates on all 60 RLBench tasks in Table 4. This table lists the per-task success rate of CoA, ACT, and DP, along with the gap of baselines over CoA. Tasks are ordered by the maximum improvement CoA achieves over either baseline, highlighting where our method provides the most substantial gains.

Table 4: Detailed results of the overall comparison on RLBench. The simplified names used in Figure 4 are matched with their corresponding original task names. The success gap between ACT, DP and CoA is shown as superscripts.

| Simplified name    | Original name                       | CoA  | ACT                   | DP                    |
|--------------------|-------------------------------------|------|-----------------------|-----------------------|
| pick up cup        | pick_up_cup                         | 0.80 | 0.20 <sup>-0.60</sup> | 0.00 <sup>-0.80</sup> |
| phone on base      | phone_on_base                       | 0.80 | 0.04 <sup>-0.76</sup> | 0.04 <sup>-0.76</sup> |
| reach target       | reach_target                        | 0.84 | 0.88 <sup>+0.04</sup> | 0.08 <sup>-0.76</sup> |
| remove meat        | meat_off_grill                      | 0.88 | 0.32 <sup>-0.56</sup> | 0.16 <sup>-0.72</sup> |
| push button        | push_button                         | 0.76 | 0.08 <sup>-0.68</sup> | 0.12 <sup>-0.64</sup> |
| put money in safe  | put_money_in_safe                   | 0.80 | 0.36 <sup>-0.44</sup> | 0.24 <sup>-0.56</sup> |
| move hanger        | move_hanger                         | 0.88 | 0.68 <sup>-0.20</sup> | 0.32 <sup>-0.56</sup> |
| slide block        | slide_block_to_target               | 0.52 | 0.32 <sup>-0.20</sup> | 0.00 <sup>-0.52</sup> |
| remove toilet roll | take_toilet_roll_off_stand          | 0.56 | 0.40 <sup>-0.16</sup> | 0.08 <sup>-0.48</sup> |
| lamp off           | lamp_off                            | 0.68 | 0.68 <sup>-0.00</sup> | 0.20 <sup>-0.48</sup> |
| lamp on            | lamp_on                             | 0.48 | 0.44 <sup>-0.04</sup> | 0.00 <sup>-0.48</sup> |
| open door          | open_door                           | 0.92 | 0.44 <sup>-0.48</sup> | 0.60 <sup>-0.32</sup> |
| open drawer        | open_drawer                         | 0.88 | 0.52 <sup>-0.36</sup> | 0.44 <sup>-0.44</sup> |
| remove frame       | take_frame_off_hanger               | 0.64 | 0.44 <sup>-0.20</sup> | 0.24 <sup>-0.40</sup> |
| open washer        | open_washing_machine                | 0.76 | 0.44 <sup>-0.32</sup> | 0.60 <sup>-0.16</sup> |
| remove pan lid     | take_lid_off_saucepan               | 0.80 | 0.40 <sup>-0.40</sup> | 0.60 <sup>-0.20</sup> |
| unplug charger     | unplug_charger                      | 0.60 | 0.56 <sup>-0.04</sup> | 0.20 <sup>-0.40</sup> |
| buzz game          | beat_the_buzz                       | 0.36 | 0.12 <sup>-0.24</sup> | 0.00 <sup>-0.36</sup> |
| remove umbrella    | take_umbrella_out_of_umbrella_stand | 0.52 | 0.16 <sup>-0.36</sup> | 0.20 <sup>-0.32</sup> |
| drag to target     | reach_and_drag                      | 0.64 | 0.36 <sup>-0.28</sup> | 0.28 <sup>-0.36</sup> |
| get ice            | get_ice_from_fridge                 | 0.60 | 0.32 <sup>-0.28</sup> | 0.24 <sup>-0.36</sup> |

Continued on next page

| Simplified name      | Original name                    | CoA  | ACT                   | DP                    |
|----------------------|----------------------------------|------|-----------------------|-----------------------|
| open box             | open_box                         | 0.32 | 0.16 <sup>-0.16</sup> | 0.32 <sup>-0.00</sup> |
| place knife          | place_knife_on_chopping_board    | 0.04 | 0.04 <sup>-0.00</sup> | 0.00 <sup>-0.04</sup> |
| play jenga           | play_jenga                       | 1.00 | 1.00 <sup>-0.00</sup> | 0.72 <sup>-0.28</sup> |
| place plate          | put_plate_in_colored_dish_rack   | 0.32 | 0.12 <sup>-0.20</sup> | 0.04 <sup>-0.28</sup> |
| put bottle in fridge | put_bottle_in_fridge             | 0.28 | 0.00 <sup>-0.28</sup> | 0.00 <sup>-0.28</sup> |
| remove plate         | take_plate_off_colored_dish_rack | 0.40 | 0.40 <sup>-0.00</sup> | 0.12 <sup>-0.28</sup> |
| turn tap             | turn_tap                         | 0.56 | 0.36 <sup>-0.20</sup> | 0.32 <sup>-0.24</sup> |
| remove from scale    | take_off_weighing_scales         | 0.84 | 0.44 <sup>-0.40</sup> | 0.64 <sup>-0.20</sup> |
| stack wine           | stack_wine                       | 0.80 | 0.56 <sup>-0.24</sup> | 0.56 <sup>-0.24</sup> |
| close drawer         | close_drawer                     | 1.00 | 0.96 <sup>-0.04</sup> | 0.76 <sup>-0.24</sup> |
| close box            | close_box                        | 1.00 | 0.96 <sup>-0.04</sup> | 0.76 <sup>-0.24</sup> |
| set clock            | change_clock                     | 0.40 | 0.28 <sup>-0.12</sup> | 0.20 <sup>-0.20</sup> |
| hang frame           | hang_frame_on_wall               | 0.16 | 0.08 <sup>-0.08</sup> | 0.00 <sup>-0.16</sup> |
| open microwave       | open_microwave                   | 0.44 | 0.40 <sup>-0.04</sup> | 0.40 <sup>-0.04</sup> |
| close fridge         | close_fridge                     | 0.92 | 0.84 <sup>-0.08</sup> | 0.76 <sup>-0.16</sup> |
| remove USB           | take_usb_out_of_computer         | 0.60 | 0.48 <sup>-0.12</sup> | 0.72 <sup>+0.12</sup> |
| change channel       | change_channel                   | 0.12 | 0.00 <sup>-0.12</sup> | 0.00 <sup>-0.12</sup> |
| insert USB           | insert_usb_in_computer           | 0.92 | 0.80 <sup>-0.12</sup> | 0.88 <sup>-0.04</sup> |
| seat down            | toilet_seat_down                 | 1.00 | 0.96 <sup>-0.04</sup> | 0.88 <sup>-0.12</sup> |
| close grill          | close_grill                      | 0.56 | 0.48 <sup>-0.08</sup> | 0.68 <sup>+0.12</sup> |
| lift block           | lift_numbered_block              | 0.08 | 0.00 <sup>-0.08</sup> | 0.08 <sup>-0.00</sup> |
| seat up              | toilet_seat_up                   | 0.84 | 0.76 <sup>-0.08</sup> | 0.88 <sup>+0.04</sup> |
| take out shoes       | take_shoes_out_of_box            | 0.08 | 0.00 <sup>-0.08</sup> | 0.16 <sup>+0.08</sup> |
| take out money       | take_money_out_safe              | 0.76 | 0.80 <sup>+0.04</sup> | 0.68 <sup>-0.08</sup> |
| screw nail           | screw_nail                       | 0.08 | 0.12 <sup>+0.04</sup> | 0.00 <sup>-0.08</sup> |
| water plants         | water_plants                     | 0.48 | 0.40 <sup>-0.08</sup> | 0.56 <sup>+0.08</sup> |
| hockey               | hockey                           | 0.08 | 0.04 <sup>-0.04</sup> | 0.00 <sup>-0.08</sup> |
| open wine            | open_wine_bottle                 | 0.36 | 0.28 <sup>-0.08</sup> | 0.40 <sup>+0.04</sup> |
| hit ball             | hit_ball_with_cue                | 0.08 | 0.00 <sup>-0.08</sup> | 0.00 <sup>-0.08</sup> |
| put groceries        | put_groceries_in_cupboard        | 0.08 | 0.04 <sup>-0.04</sup> | 0.00 <sup>-0.08</sup> |
| turn on oven         | turn_oven_on                     | 0.36 | 0.32 <sup>-0.04</sup> | 0.28 <sup>-0.08</sup> |
| set checkers         | setup_checkers                   | 0.04 | 0.00 <sup>-0.04</sup> | 0.04 <sup>-0.00</sup> |
| basketball           | basketball_in_hoop               | 0.76 | 0.72 <sup>-0.04</sup> | 0.72 <sup>-0.04</sup> |
| hang hanger          | place_hanger_on_rack             | 0.32 | 0.04 <sup>-0.28</sup> | 0.00 <sup>-0.32</sup> |
| open grill           | open_grill                       | 0.24 | 0.00 <sup>-0.24</sup> | 0.00 <sup>-0.24</sup> |
| straighten rope      | straighten_rope                  | 0.00 | 0.04 <sup>+0.04</sup> | 0.00 <sup>-0.00</sup> |
| sweep dust           | sweep_to_dustpan                 | 0.92 | 1.00 <sup>+0.08</sup> | 1.00 <sup>+0.08</sup> |
| press switch         | press_switch                     | 0.44 | 0.52 <sup>+0.08</sup> | 0.56 <sup>+0.12</sup> |
| close microwave      | close_microwave                  | 0.72 | 0.80 <sup>+0.08</sup> | 0.80 <sup>+0.08</sup> |

## C Hyperparameters for RL Bench

We provide the training and evaluation hyperparameters for CoA and all baseline methods used in the simulation experiments. To ensure a fair comparison, the hyperparameters for ACT are largely aligned with those of CoA, allowing us to isolate and assess the impact of our proposed modeling paradigm. For DP, we observe slower convergence relative to CoA and ACT, and thus extend its training duration to 100,000 iterations. In addition, we incorporate temporal ensembling into DP following the implementation in ACT. Octo converges substantially faster, and we find that 2,000 training iterations are sufficient. Given that Octo is primarily pretrained on single-camera data, we finetune it using only the front camera, while increasing the image resolution to enhance visual fidelity. All models are trained on a single NVIDIA H100 GPU per task.

Table 5: Hyperparameters for CoA

|                       |                                             |
|-----------------------|---------------------------------------------|
| Backbone              | ImageNet-trained ResNet18 [10]              |
| Action dimension      | 8 (3 position + 4 quaternion + 1 gripper)   |
| Cameras               | wrist, front, right shoulder, left shoulder |
| Learning rate         | $1e^{-4}$                                   |
| Weight decay          | $1e^{-4}$                                   |
| Image size            | $128 \times 128$                            |
| Execution horizon     | 1                                           |
| Observation horizon   | 1                                           |
| # encoder layers      | 4                                           |
| # decoder layers      | 7 (6 + 1 multi-token prediction layer)      |
| # heads               | 8                                           |
| Feedforward dimension | 3200                                        |
| Hidden dimension      | 512                                         |
| Dropout               | 0.1                                         |
| Iteration             | 20000                                       |
| Batch size            | 128                                         |
| Temporal ensembling   | true (reverse temporal ensemble)            |
| Action normalization  | $[-1, 1]$                                   |

Table 6: Hyperparameters for ACT

|                       |                                             |
|-----------------------|---------------------------------------------|
| Backbone              | ImageNet-trained ResNet18 [10]              |
| Action dimension      | 8 (3 position + 4 quaternion + 1 gripper)   |
| Cameras               | wrist, front, right shoulder, left shoulder |
| Learning rate         | $1e^{-4}$                                   |
| Weight decay          | $1e^{-4}$                                   |
| Image size            | $128 \times 128$                            |
| Action sequence       | 20                                          |
| Execution horizon     | 1                                           |
| Observation horizon   | 1                                           |
| # encoder layers      | 4                                           |
| # decoder layers      | 6                                           |
| # heads               | 8                                           |
| Feedforward dimension | 3200                                        |
| Hidden dimension      | 768                                         |
| Dropout               | 0.1                                         |
| Iteration             | 20000                                       |
| Batch size            | 128                                         |
| Temporal ensembling   | true                                        |
| Action normalization  | $[-1, 1]$                                   |

Table 7: Hyperparameters for DP

|                             |                                             |
|-----------------------------|---------------------------------------------|
| Backbone                    | ImageNet-trained ResNet18 [10]              |
| Noise predictor             | UNet [29]                                   |
| Action dimension            | 8 (3 position + 4 quaternion + 1 gripper)   |
| Cameras                     | wrist, front, right shoulder, left shoulder |
| Learning rate               | $1e^{-4}$                                   |
| Weight decay                | $1e^{-6}$                                   |
| Image size                  | $128 \times 128$                            |
| Observation horizon         | 1                                           |
| Action sequence             | 20                                          |
| Execution horizon           | 1                                           |
| Train, test diffusion steps | 50, 50                                      |
| Hidden dimension            | 512                                         |
| Iteration                   | 100000                                      |
| Batch size                  | 128                                         |
| Temporal ensembling         | true (following ACT’s)                      |
| Scheduler                   | DDPM [12]                                   |
| Action normalization        | [-1, 1]                                     |

Table 8: Hyperparameters for Octo

|                      |                                                     |
|----------------------|-----------------------------------------------------|
| Pretrained model     | Octo-small [28]                                     |
| Action dimension     | 8 (7 delta joints + 1 gripper)                      |
| Cameras              | front                                               |
| Learning rate        | $3e^{-4}$                                           |
| Weight decay         | $1e^{-2}$                                           |
| Image size           | $256 \times 256$                                    |
| Observation horizon  | 1                                                   |
| Action sequence      | 4                                                   |
| Execution horizon    | 1                                                   |
| Iteration            | 2000                                                |
| Batch size           | 128                                                 |
| Temporal ensembling  | false                                               |
| Action normalization | mean 0, std 1                                       |
| Finetuning head      | linear head                                         |
| Image augmentation   | resized crop, brightness, contrast, saturation, hue |

## D ACT variant with keyframe action

To further examine the impact of keyframe action on action sequence modeling, we conduct an additional ablation by modifying the ACT baseline. Specifically, we introduce a variant, ACT+KF, in which an extra keyframe action is appended to ACT’s original action chunk.

As shown in Table 9, ACT+KF achieves a higher average success rate (0.516) compared to the original ACT (0.488), indicating that injecting keyframe actions yields marginal improvements. However, the overall gain remains limited.

This result suggests that while keyframe actions may provide some global guidance, they do not substantially improve the final action quality when introduced in this manner. A similar trend is observed in the poor performance of *Hybrid* (Table 2), a variant of CoA that incorporates both keyframe supervision and causal decoding but lacks trajectory continuity. The limited effectiveness of both ACT+KF and Hybrid underscores a key insight: merely injecting keyframe signals and enforcing an autoregressive structure is not sufficient. Instead, it is crucial to model the entire trajectory holistically with temporal continuity, which is explicitly realized in our CoA formulation.

Table 9: Comparison of ACT vs. ACT+KF (with keyframe action) on 10 RLBench tasks.

| <b>Task</b>  | <b>ACT</b> | <b>ACT+KF</b> |
|--------------|------------|---------------|
| Stack Wine   | 0.56       | 0.56          |
| Turn Tap     | 0.36       | 0.32          |
| Open Drawer  | 0.52       | 0.76          |
| Push Button  | 0.08       | 0.16          |
| Pick Up Cup  | 0.20       | 0.36          |
| Take Lid     | 0.40       | 0.40          |
| Press Switch | 0.52       | 0.28          |
| Reach Target | 0.88       | 0.72          |
| Sweep Dust   | 1.00       | 0.96          |
| Open Box     | 0.36       | 0.64          |
| Avg.         | 0.488      | <b>0.516</b>  |
